# Supplementary material
Source: PubMed Central journal article supplement (PMC2410074)

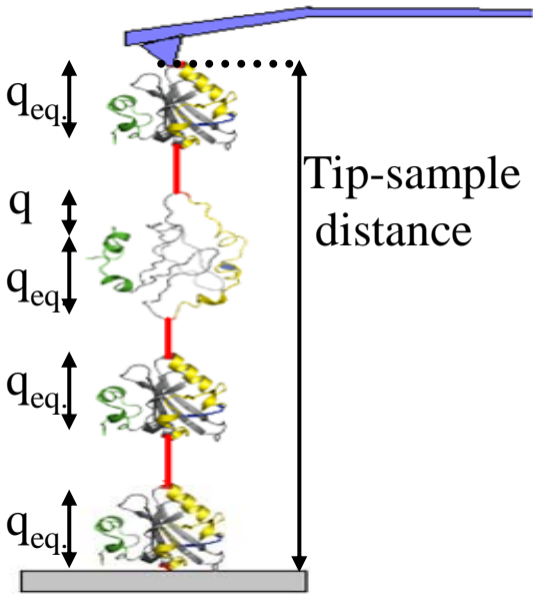

Supplement: pnas_0701281105_1.pdf [file pnas_0701281105_1.pdf]

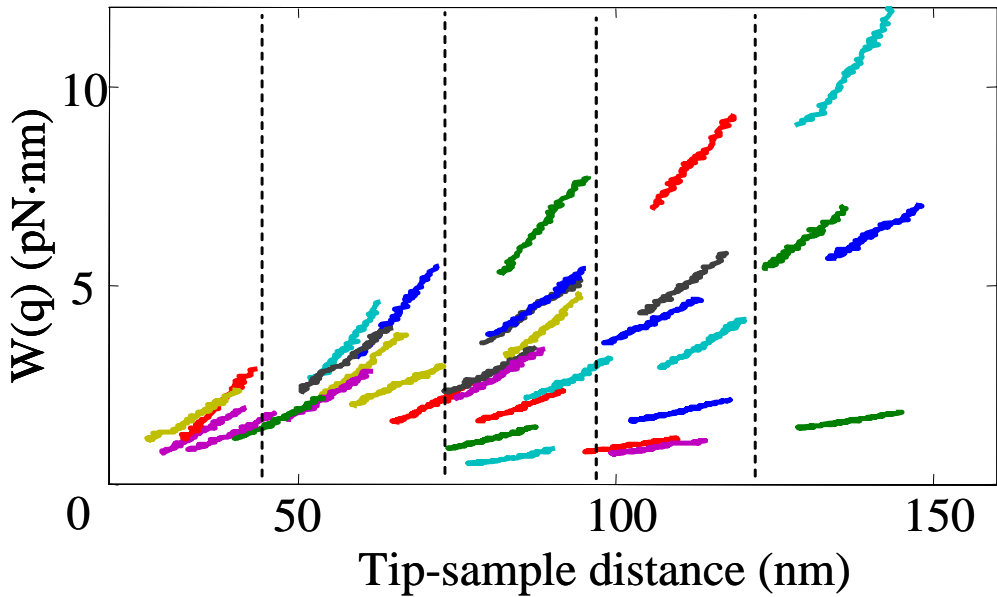

Supplement: pnas_0701281105_2.pdf [file pnas_0701281105_2.pdf]

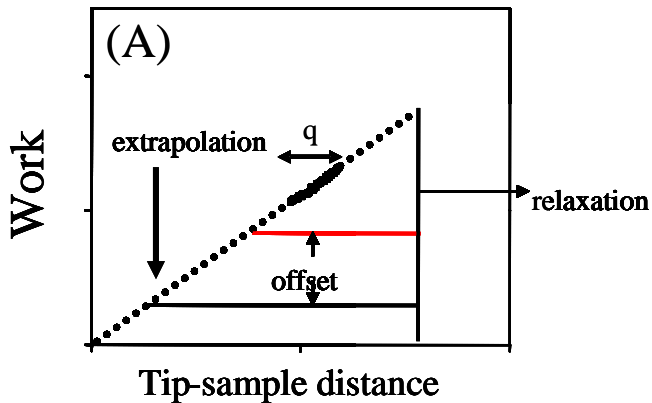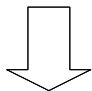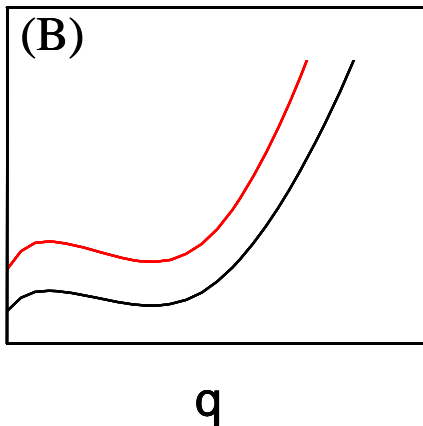

Supplement: pnas_0701281105_3.pdf [file pnas_0701281105_3.pdf]

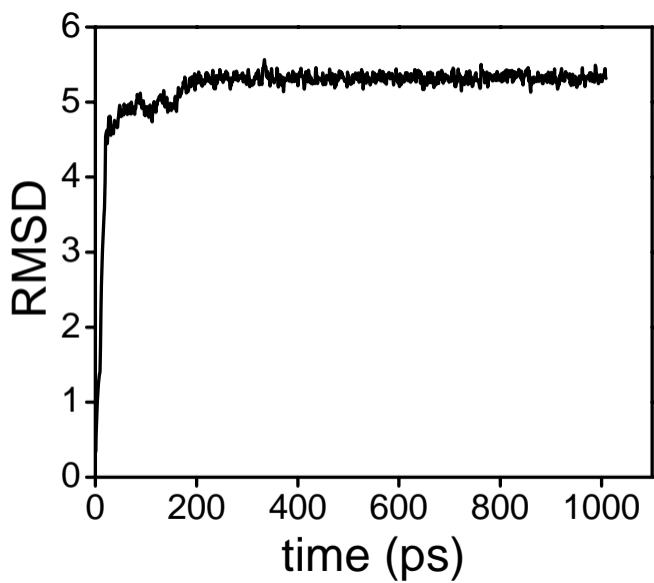

Supplement: pnas_0701281105_4.pdf [file pnas_0701281105_4.pdf]

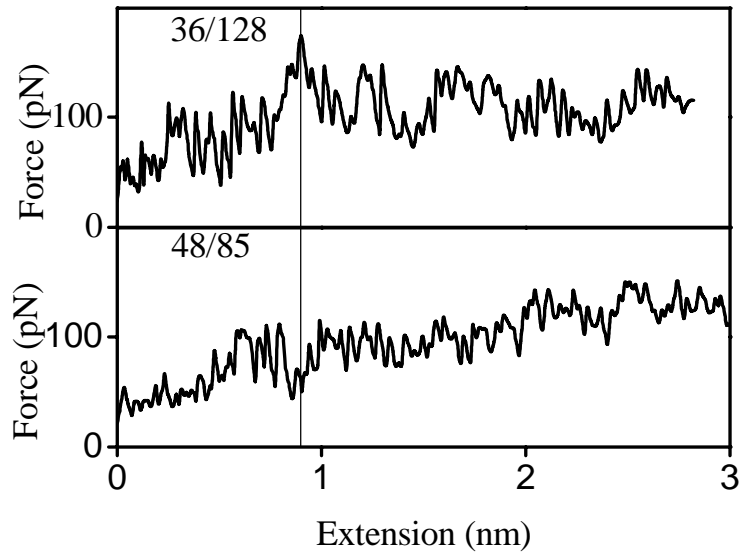

Supplement: pnas_0701281105_5.pdf [file pnas_0701281105_5.pdf]

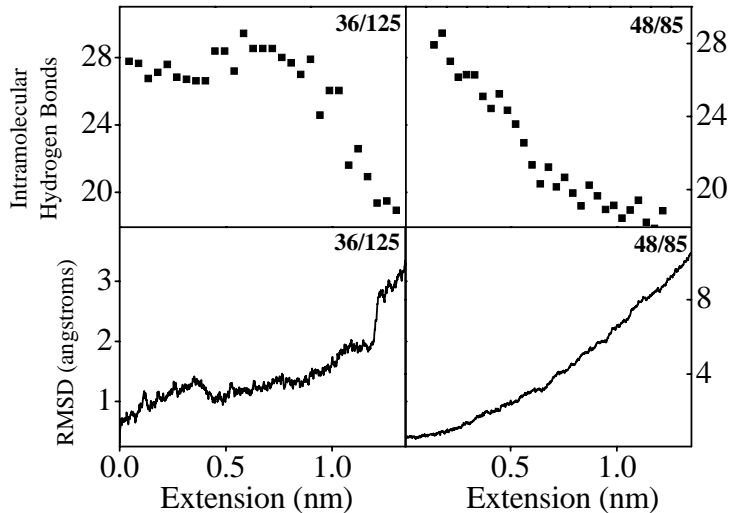

Supplement: pnas_0701281105_6.pdf [file pnas_0701281105_6.pdf]

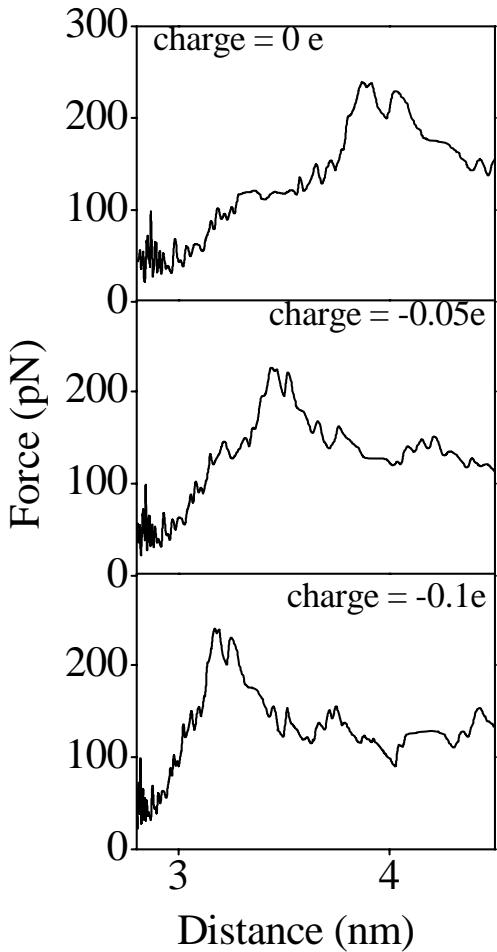

Supplement: pnas_0701281105_7.pdf [file pnas_0701281105_7.pdf]
